# Supplementary material
Source: PubMed Central journal article supplement (PMC3415378)
Supplement: NIHMS386523-supplement-supplement.pdf [file NIHMS386523-supplement-supplement.pdf]

## Online Supplement

**An essential role for  $\Delta$ FosB in the median preoptic nucleus in the sustained hypertensive effects of intermittent hypoxia.**

**Abbreviated title:** MnPO  $\Delta$ FosB contributes to IH-induced hypertension

**Authors:** J. Thomas Cunningham<sup>1</sup>, W. David Knight<sup>1</sup>, Steven W. Mifflin<sup>1</sup>, Eric J. Nestler<sup>2</sup>

<sup>1</sup>Department of Integrative Physiology and the Cardiovascular Research Institute  
University of North Texas Health Science Center at Fort Worth, Fort Worth, TX 76107

<sup>2</sup>Departments of Neuroscience, Pharmacology and Systems Therapeutics, Psychiatry,  
and Friedman Brain Institute, Mount Sinai School of Medicine, New York, NY 10029

Corresponding author:

J. Thomas Cunningham  
Department of Integrative Physiology  
University of North Texas Health Science Center at Fort Worth  
3500 Camp Bowie Blvd  
Fort Worth, TX 76107  
Phone: 817-735-5096  
Fax: 817-735-5084  
e-mail: [Tom.Cunningham@unthsc.edu](mailto:Tom.Cunningham@unthsc.edu)

Supplementary Table 1: Average baseline recordings obtained from 0800-1600 h during the light phase exposure to intermittent hypoxia (IH) and during the dark phase (DK) for each group.

|      | n |    | MAP<br>(mmHg) | HR<br>(bpm) | RR<br>(bpm) |
|------|---|----|---------------|-------------|-------------|
| Sham | 5 | IH | 97 ± 2        | 316 ± 13    | 87 ± 2      |
|      |   | DK | 102 ± 4       | 384 ± 12    | 99 ± 2      |
| AV3V | 6 | IH | 99 ± 3        | 313 ± 8     | 83 ± 2      |
|      |   | DK | 104 ± 3       | 381 ± 9     | 97 ± 2      |

Supplementary Table 2: Average baseline recordings obtained from 0800-1600 h during the light phase exposure to intermittent hypoxia (IH) and during the dark phase (DK) for each group.

|             | n  |    | MAP<br>(mmHg) | HR<br>(bpm) | RR<br>(bpm) | Act<br>(cpm) |
|-------------|----|----|---------------|-------------|-------------|--------------|
| CON         | 13 | IH | 91 ± 1.3      | 352 ± 3     | 106 ± 1     | 1.3 ± 0.2    |
|             |    | DK | 96 ± 1.2      | 405 ± 5     | 106 ± 1     | 5.7 ± 0.6    |
| CIH         | 16 | IH | 93 ± 2.3      | 340 ± 4     | 102 ± 2*    | 0.9 ± 0.1    |
|             |    | DK | 98 ± 2.5      | 396 ± 6     | 103 ± 1     | 3.4 ± 0.4*   |
| CIH + GFP   | 17 | IH | 99 ± 1.4*     | 323 ± 4**   | 99 ± 2*     | 1.5 ± 0.2    |
|             |    | DK | 102 ± 1.0     | 389 ± 4*    | 104 ± 2     | 4.8 ± 0.5    |
| CIH + ΔJunD | 12 | IH | 98 ± 1.3*     | 324 ± 5*    | 92 ± 2*     | 1.3 ± 0.2    |
|             |    | DK | 103 ± 1.3*    | 392 ± 8     | 101 ± 2     | 4.1 ± 0.5    |

\* P < 0.05 from CON. \*\* P < 0.05 from CIH. One-way ANOVA and Student-Newman-Keuls tests.

Supplementary Figure 1 – Cunningham et al.

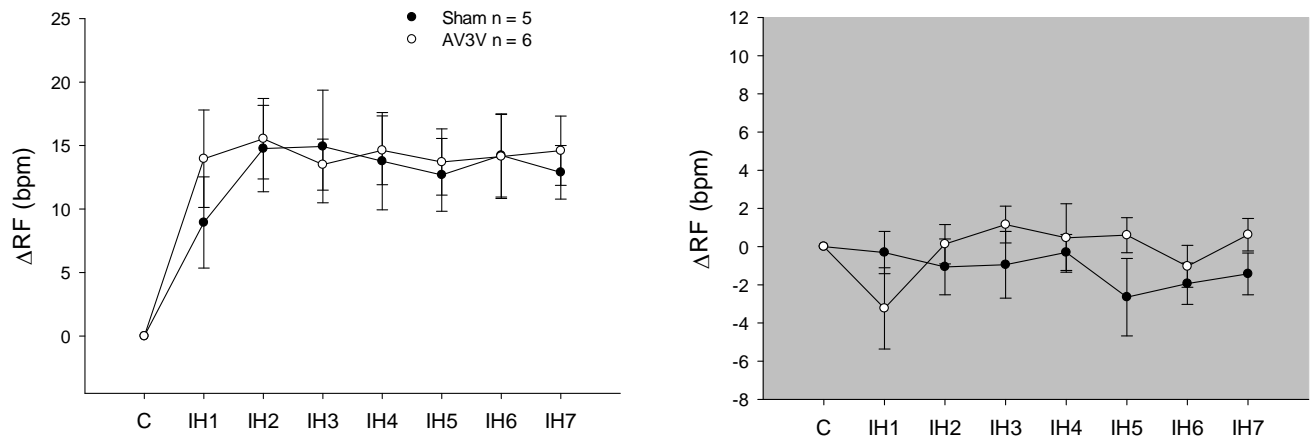

Supplementary Figure1: Changes in respiratory frequency during intermittent hypoxia exposure (left) and during the normoxic dark phase (right) in sham lesioned and AV3V lesioned rats. There were no differences between the groups for either time period.

Supplementary Figure 2 – Cunningham et al.

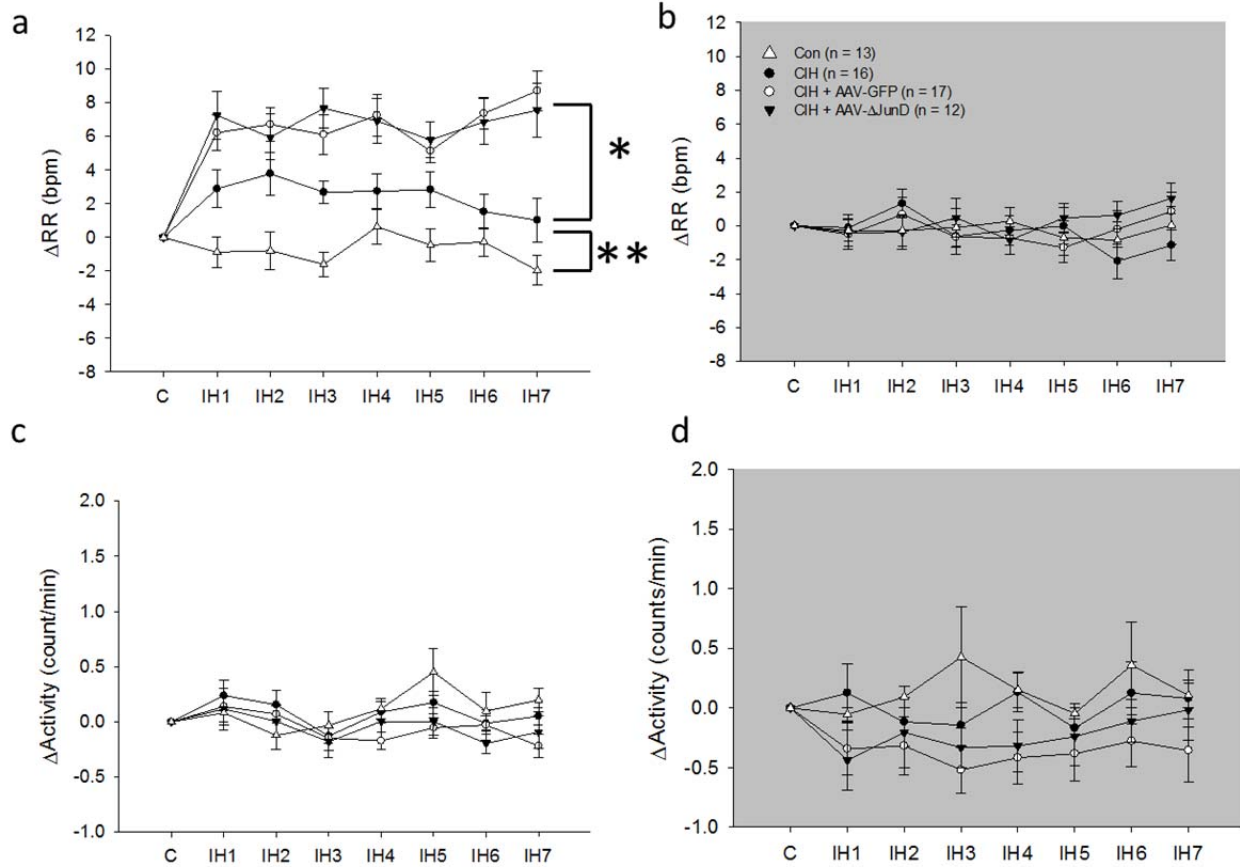

Supplementary Figure 2: (a) During intermittent hypoxia exposure uninjected rats exposed to CIH demonstrated changes in respiratory rate significantly higher than normoxic controls while CIH rats injected with the two viral vectors demonstrated increases in respiratory rate that were greater than the other two groups but not different from each other. (b) There were no significant differences among the 4 groups for respiratory rate recorded during normoxia during the dark phase. (c & d) There were no significant differences among groups for activity during intermittent hypoxia exposure or the normoxic dark phase. Data were analyzed by two-way repeated measures ANOVA. \*\* is different from control. \* is different from control and CIH.

| Symbol  | Fold diff. (NS) | p value | Alias(es)                      | Symbol    | Fold diff. (NS) | p value | Alias(es)                                   |
|---------|-----------------|---------|--------------------------------|-----------|-----------------|---------|---------------------------------------------|
| Tnf*    | -1.01           | 0.963   | TNF- $\alpha$ , cachectin      | Map3k1*   | 1.28            | 0.163   | MEKK1, MAPKKK1                              |
| Grasp*  | 1.58            | 0.061   | Tamalin                        | Map2k5    | 1.23            | 0.072   | MEK5, MAPKK5                                |
| Bdnf*   | 1.10            | 0.833   | neurotrophin                   | Nras      | 1.15            | 0.201   | NRAS-1, NS6                                 |
| Nfkbia  | 1.25            | 0.155   | IKB-a, MAD-3                   | Kras      | 1.09            | 0.706   | KRAS-1, NS3                                 |
| Creb1   | 1.01            | 0.900   | CREB                           | Rac1      | 1.10            | 0.430   | p21-Rac1                                    |
| Agtr2*  | 1.16            | 0.645   | AT2R                           | Mapk1     | 1.07            | 0.424   | p42MAPK, ERK-2                              |
| Aplnr*  | -1.97           | 0.103   | AGTRL1                         | Mapk3     | 1.07            | 0.413   | p44MAPK, ERK-1, p44ERK                      |
| Agt     | -1.04           | 0.762   |                                | Mapk6     | 1.01            | 0.906   | p97MAPK, ERK-3                              |
| Gad1    | 1.87            | 0.140   | GAD67                          | Mapk7*    | 1.23            | 0.088   | ERK-5, BMK-1                                |
| Gad2    | 1.72            | 0.214   | GAD65                          | Mapk8     | 1.04            | 0.842   | JNK1, SAPK1, JNK-46                         |
| Gria1   | 1.38            | 0.235   | GluR1, GluR-A                  | Mapk12    | 1.15            | 0.166   | ERK6, SAPK3, MAPK-p38 $\gamma$              |
| Gria2   | 1.30            | 0.208   | GluR2, GluR-B                  | Ccl11*    | 1.07            | 0.810   | SCYA11, eotaxin                             |
| Grin1   | 1.07            | 0.606   | NR1, NMDAR1                    | Ccl22*    | 1.07            | 0.810   | SCYA22, MDC(1-69)                           |
| Grin2b  | 1.23            | 0.076   | NR2B, NMDAR2B                  | Ccl24*    | 1.49            | 0.301   | Ckb-6, MPIF2, SCYA24, eotaxin-2             |
| Gpx1    | -1.03           | 0.696   | CGPX                           | Ccl7*     | 1.16            | 0.587   | SCYA7, MCP-3                                |
| Gpx4    | 1.13            | 0.324   | PHGPX                          | Cxcl10*   | 1.54            | 0.565   | SCYB10, CRG-2, IP-10                        |
| Sod1    | -1.01           | 0.915   | IC-SOD                         | Ccr1*     | 1.30            | 0.398   | RANTES-R, MIP-1 $\alpha$ -R                 |
| Sod2    | -1.06           | 0.783   | MT-SOD                         | Ccr3*     | -1.09           | 0.758   | MIP-1 $\alpha$ -RL2                         |
| Sod3    | 1.12            | 0.515   | EC-SOD                         | Ccr5      | 1.30            | 0.155   |                                             |
| Prdx1   | -1.06           | 0.746   | Tdpx2, NKEFA                   | Cx3cr1    | 1.25            | 0.064   | fractalkine receptor                        |
| Prdx4   | -1.15           | 0.143   | TDPRXA0372                     | Il1a*     | 1.79            | 0.181   | IL-1 $\alpha$ , IL1, IL1F1, hematopoietin-1 |
| Prdx5   | 1.12            | 0.526   | PRDXPMP20                      | Il1b*     | 1.09            | 0.771   | IL-1 $\beta$                                |
| Ptgs1*  | 1.20            | 0.335   | COX-1, PH2-1                   | Il6*      | -1.07           | 0.809   | BSF2, IFN $\beta$ 2                         |
| Nox4*   | 1.62            | 0.487   | RENOX                          | Lep*      | 1.07            | 0.810   | OB                                          |
| Nox1*   | -1.20           | 0.599   | p51NOX                         | Il4*      | 1.25            | 0.470   | BCGF1, binetrakin, BSF1                     |
| Hmox1*  | -1.15           | 0.292   | HO1                            | Il5*      | 1.07            | 0.810   | TRF, EDF, BDF1                              |
| Hyou1   | 1.15            | 0.324   | ORP150                         | Il10*     | 1.07            | 0.810   | CSIF, IL10A                                 |
| Adm*    | -1.18           | 0.584   | ADM                            | Il13*     | 1.07            | 0.810   | p600, TCAP                                  |
| Ece1    | 1.07            | 0.428   | ECE                            | Il1r1*    | -1.07           | 0.746   | p80, IL-1R $\alpha$                         |
| Igf2    | -1.07           | 0.753   | SOM-A                          | Il1r2*    | 1.07            | 0.810   | IL-1R $\beta$                               |
| Igf1r   | 1.06            | 0.427   | IGFI-R                         | Tnfrsf1a  | -1.15           | 0.408   | p55-R, p60, TNF-R1, CD120a                  |
| Igfbp1* | -1.10           | 0.749   | IBP1                           | Tnfrsf1b* | 1.16            | 0.494   | p75, TNF-R2, CD120b                         |
| Ppara*  | -1.38           | 0.423   | PPAR, NR1C1                    | ob-r*     | -1.62           | 0.188   | FA, OB-R, DB                                |
| Vegfa   | 1.21            | 0.063   | VEGF-a                         | Il8rb*    | 1.07            | 0.810   | (cxcr2 in humans)                           |
| Bcl2    | 1.21            | 0.169   |                                | Il6st     | 1.10            | 0.239   | gp130, IL6-R $\beta$ , IL6R2                |
| Hif3a*  | 1.38            | 0.169   | HIF-3 $\alpha$ , PASD7         | Ren*      | 1.10            | 0.713   | AGTase                                      |
| Hif1a   | 1.10            | 0.206   | MOP1                           | Prkaa1    | -2.50           | 0.207   | AMPK- $\alpha$ 1                            |
| Mapk14* | 1.28            | 0.070   | p38MAPK, p38- $\alpha$ , CSBP1 | Il6ra*    | -1.13           | 0.562   | IL6R1, gp80                                 |
| Hspa5   | 1.13            | 0.200   | GRP-78, BiP                    | Agtr1b*   | 1.07            | 0.810   | AT1bR, AT2R1B, AT3R                         |
| Hiflan  | -1.12           | 0.505   | FIH-1                          | JunD      | -1.10           | 0.499   | JunD1, AP-1(inhibitor)                      |

Supplementary Figure 3: Genes with consensus AP-1 regulatory domains that were not affected by CIH. MnPO samples were obtained from normoxic controls and uninjected rats exposed to CIH for 7 days. Data are expressed as fold differences. Samples from individual rats were analyzed separately. n = 5 per group. \* indicate genes with an average Ct > 30.
